# Supplementary material for: An anthracene–quinoline based dual-mode fluorometric–colorimetric sensor for the detection of Fe3+ and its application in live cell imaging
Source: Royal Society of Chemistry journal article supplement (doi:10.1039/d1nj00178g), 2021-01-01
Supplement: d1nj00178g1.pdf [file d1nj00178g1.pdf]

New Journal of Chemistry

Electronic Supplementary Information

An anthracene-quinoline based dual-mode colorimetric/fluorometric sensor for  
detection of Fe<sup>3+</sup> and its application in live cell imaging

Tahereh Tehrani <sup>a</sup>, Soraia Meghdadi <sup>a</sup>□, Zohreh Salarvand <sup>b</sup>, Behnam Tavakoli <sup>a</sup>, Kiamars  
Eskandari<sup>a</sup> and Mehdi Amirnasr <sup>a</sup>□

<sup>a</sup> *Department of Chemistry, Isfahan University of Technology, Isfahan 8415683111, Iran*

<sup>b</sup> *Department of Chemistry, Chemistry and Petrochemistry Research Center, Institute of Standard  
and Industrial Research of Iran (ISIRI), Karaj 3174734563, Iran*

Corresponding authors: M. Amirnasr, S. Meghdadi

\*E-mail addresses: amirnasr@cc.iut.ac.ir

smeghdad@cc.iut.ac.ir

**Amirnasr ORCID:** [0000-0002-4232-2097](https://orcid.org/0000-0002-4232-2097)

**Meghdadi ORCID:** [0000-0002-2597-9521](https://orcid.org/0000-0002-2597-9521)

| Table of Contents                                                                                                                                                                                                                           | Page  |
|---------------------------------------------------------------------------------------------------------------------------------------------------------------------------------------------------------------------------------------------|-------|
| <b>Fig. S1.</b> The retardation factor ( $R_f$ ) of <b>HAQ</b> in EtOAc/Hexan, 30/70.....                                                                                                                                                   | 3     |
| <b>Fig. S2.</b> FT-IR spectrum of the chemosensor <b>HAQ</b> (KBr pellet).....                                                                                                                                                              | 4     |
| <b>Fig. S3.</b> $^1\text{H}$ NMR spectrum of the chemosensor <b>HAQ</b> in DMSO- $d_6$ at room temperature.....                                                                                                                             | 4     |
| <b>Fig. S4.</b> $^{13}\text{C}$ NMR spectrum of the chemosensor <b>HAQ</b> in DMSO- $d_6$ at 293.5 K.....                                                                                                                                   | 5     |
| <b>Fig. S5.</b> Absorption spectra of <b>HAQ</b> in DMSO ( $1.0 \times 10^{-5}$ M) at room temperature.....                                                                                                                                 | 5     |
| <b>Fig. S6.</b> Changes in the absorption spectrum of <b>HAQ</b> ( $1.0 \times 10^{-5}$ M) in the presence of increasing concentration (0–180 $\mu\text{M}$ ) of $\text{Fe}^{3+}$ ion in a DMSO solution.....                               | 6     |
| <b>Fig. S7.</b> Stern-Volmer plot obtained from <b>HAQ</b> titration with $\text{Fe}^{3+}$ .....                                                                                                                                            | 6     |
| <b>Fig. S8.</b> The fluorescence spectrum linear range of <b>HAQ</b> (50 $\mu\text{M}$ ) at 386 nm upon addition of $\text{Fe}^{3+}$ . (Determination of LOD).....                                                                          | 7     |
| <b>Fig. S9.</b> The Association constant ( $K_a$ ) of <b>AQ-Fe<math>^{3+}</math></b> complex.....                                                                                                                                           | 8     |
| <b>Fig. S10.</b> Job's plot of the <b>AQ-Fe<math>^{3+}</math></b> complex in DMSO, with the monitoring wavelength set at 486 nm.....                                                                                                        | 8     |
| <b>Fig. S11.</b> ESI-MS spectrum for <b>AQ-Fe<math>^{3+}</math></b> in DMSO with the peak at $m/z = 571$ corresponding to $\{[(\text{AQ})\text{FeCl}_2(\text{H}_2\text{O})(\text{DMSO})] + \text{H}^+\}$ (calculated $m/z = 571.296$ )..... | 9     |
| <b>X-ray crystallography of HAQ</b> .....                                                                                                                                                                                                   | 10    |
| <b>Table S1.</b> Crystal data and structure refinement for chemosensor <b>HAQ</b> .....                                                                                                                                                     | 10    |
| <b>Table S2.</b> Selected bond lengths ( $\text{\AA}$ ) and angles ( $^\circ$ ) for chemosensor <b>HAQ</b> .....                                                                                                                            | 10    |
| <b>Table S3.</b> Structural data of chemosensor <b>HAQ</b> and $[(\text{AQ})\text{FeCl}_2(\text{H}_2\text{O})(\text{DMSO})]$ complex.....                                                                                                   | 11    |
| <b>Fig. 11</b> Structures and Profiles of frontier molecular orbitals of the <b>HAQ</b> and $[(\text{AQ})\text{FeCl}_2(\text{H}_2\text{O})(\text{DMSO})]$ .....                                                                             | 12-23 |

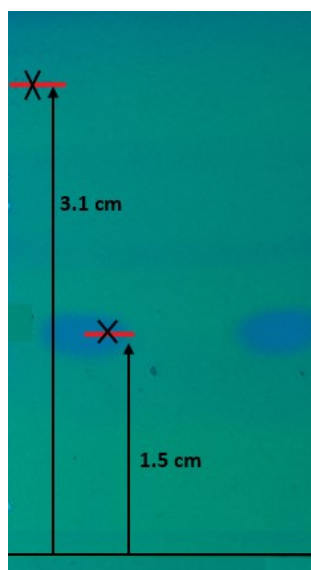

$$R_f = \frac{1.5}{3.1} = 0.48$$

**Fig. S1.** The retardation factor ( $R_f$ ) of **HAQ** in EtOAc/Hexan, 30/70.

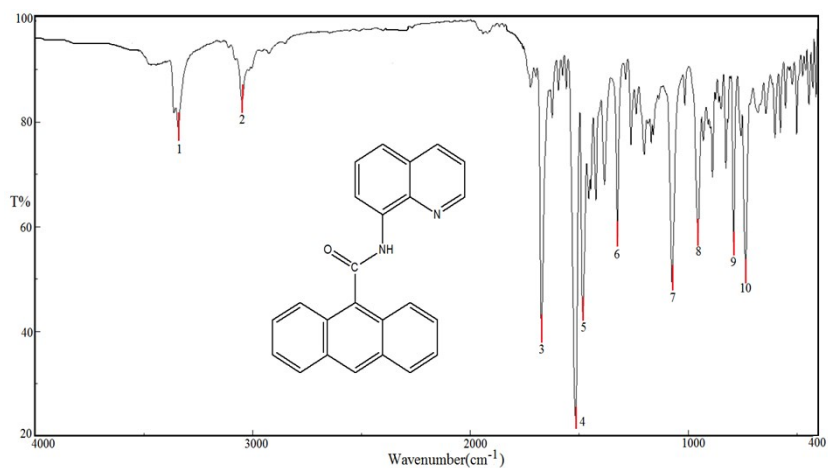

Result of peak picking

| No. | cm-1    | %T      | No. | cm-1    | %T      | No. | cm-1    | %T      |
|-----|---------|---------|-----|---------|---------|-----|---------|---------|
| 1   | 3343    | 43.1602 | 2   | 3052.76 | 48.2893 | 3   | 1672.95 | 28.2712 |
| 4   | 1516.74 | 16.8293 | 5   | 1483.96 | 31.4983 | 6   | 1324.86 | 42.7445 |
| 7   | 1074.16 | 37.7972 | 8   | 953.627 | 45.7512 | 9   | 790.671 | 45.3878 |
| 10  | 734.746 | 41.3309 |     |         |         |     |         |         |

**Fig. S2.** FT-IR spectrum of the chemosensor **HAQ** (KBr pellet).

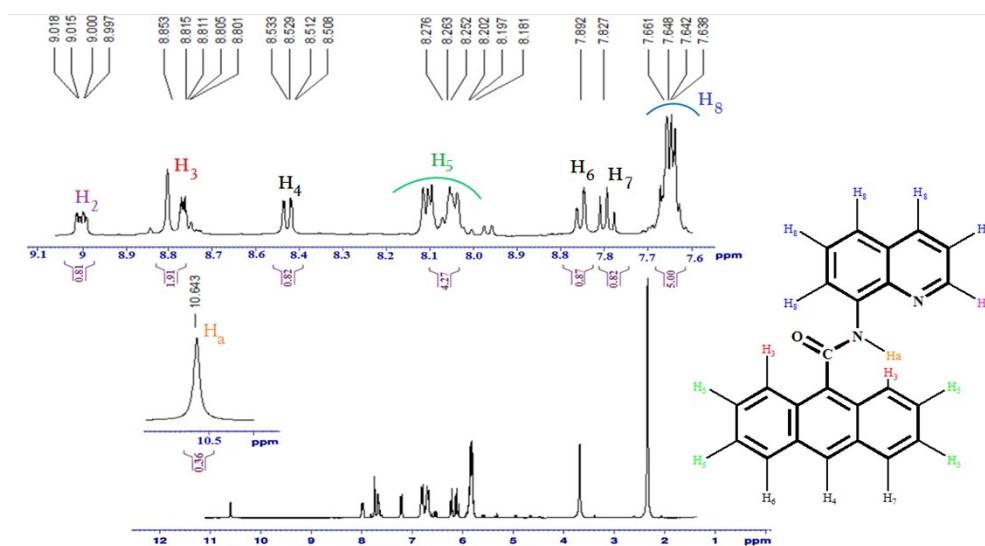

**Fig. S3.**  $^1\text{H}$  NMR spectrum of the chemosensor **HAQ** in  $\text{DMSO-d}_6$  at room temperature.

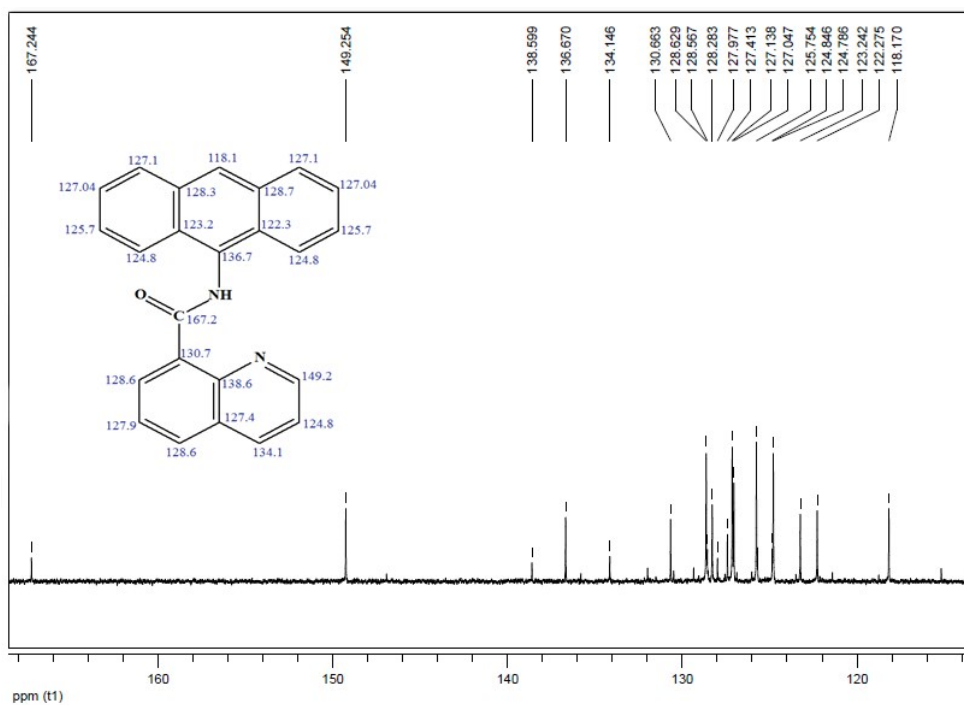

**Fig. S4.** <sup>13</sup>C NMR spectrum of the chemosensor HAQ in DMSO-d<sub>6</sub> at 293.5 K.

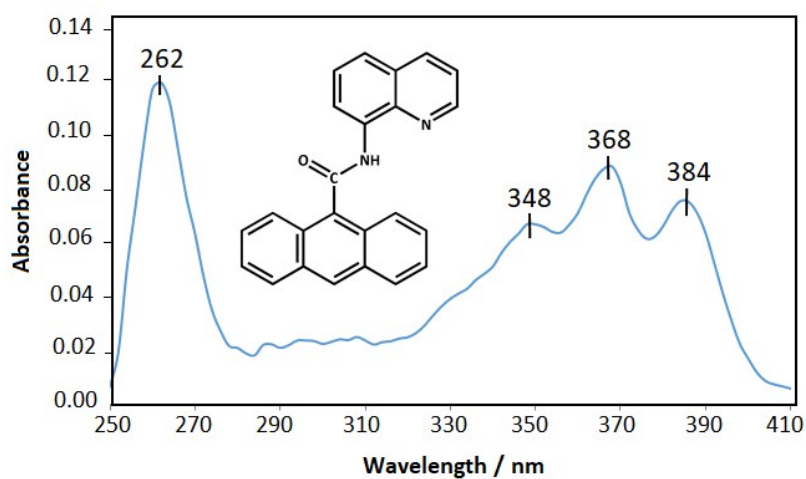

**Fig. S5.** Absorption spectra of HAQ in DMSO ( $1.0 \times 10^{-5}$  M) at room temperature.

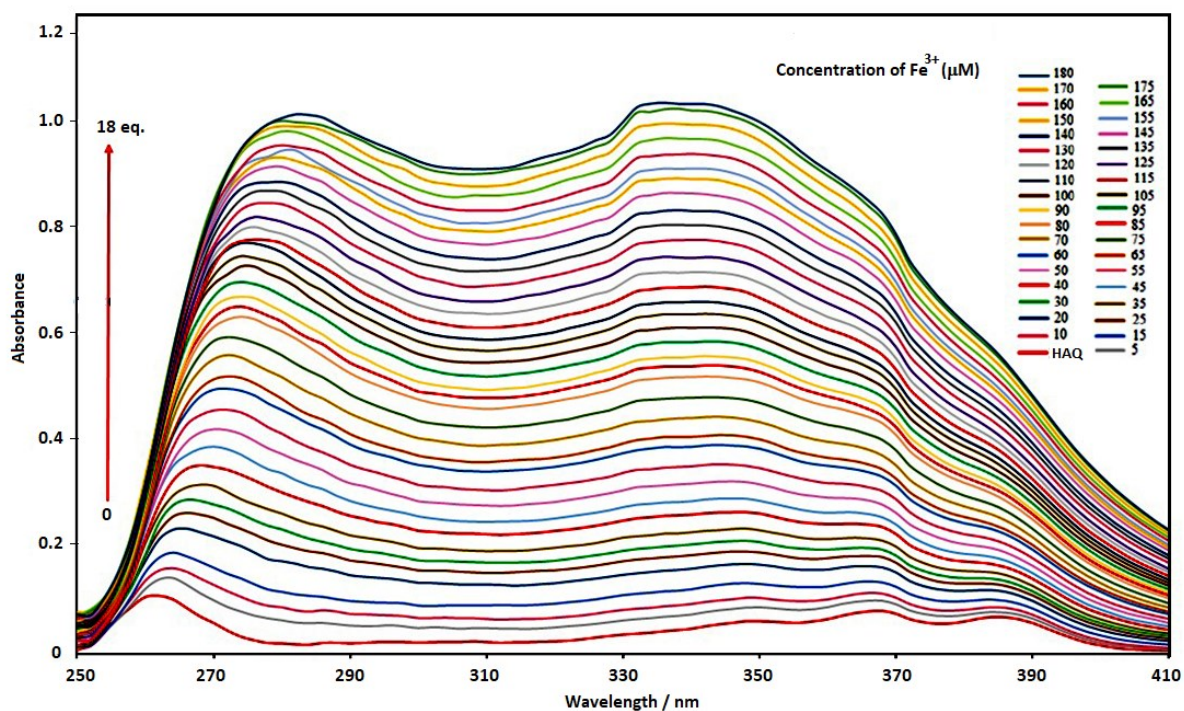

**Fig. S6.** Changes in the absorption spectrum of **HAQ** ( $1.0 \times 10^{-5}$  M) in the presence of increasing concentration (0–180  $\mu\text{M}$ ) of  $\text{Fe}^{3+}$  ion in a DMSO solution.

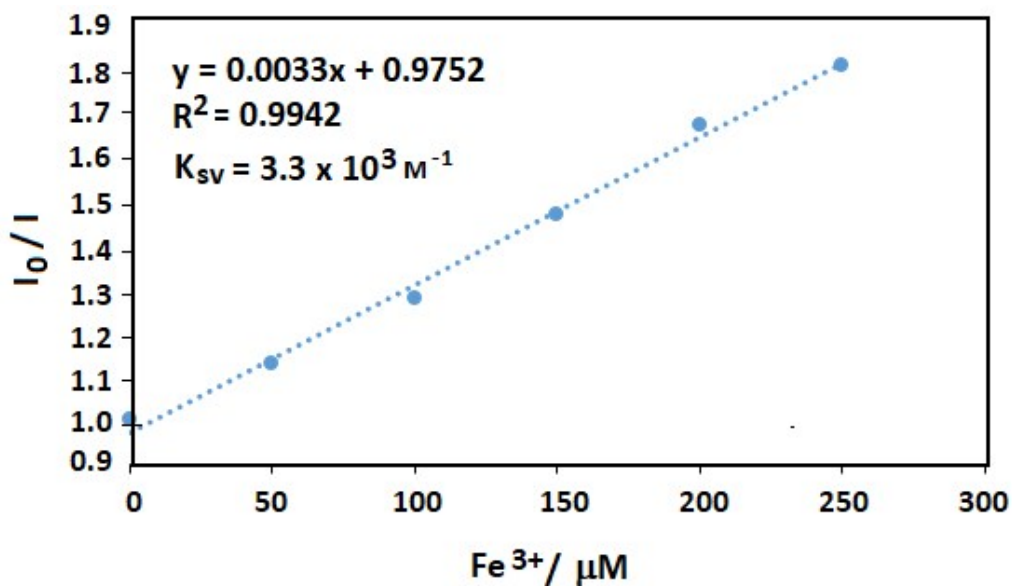

**Fig. S7.** Stern-Volmer plot obtained from **HAQ** titration with  $\text{Fe}^{3+}$ .  $K_{\text{sv}} = 3.3 \times 10^3 \text{ M}^{-1}$ .

Determination of LOD for HAQ as Fe<sup>3+</sup> chemosensor.

| [Fe <sup>3+</sup> ]/ $\mu$ M | Average Fl. | STDEV   |
|------------------------------|-------------|---------|
| 0                            | 970.88      | 0.87899 |
| 50                           | 941.342     | 0.87379 |
| 100                          | 837.879     | 0.87364 |
| 150                          | 727.642     | 0.86638 |
| 200                          | 618.634     | 0.86265 |
| 250                          | 490.741     | 0.85867 |
| 300                          | 395.634     | 0.82821 |
| 350                          | 327.64      | 0.80976 |
| 400                          | 254.562     | 0.80375 |

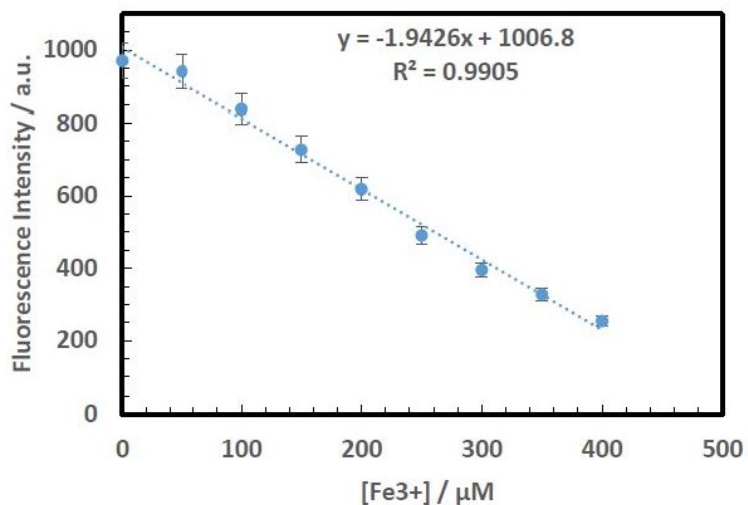

| [Fe <sup>3+</sup> ]/ $\mu$ M | Fl. Intensity at $\lambda_{ex}$ |
|------------------------------|---------------------------------|
| 0                            | 964.071                         |
| 0                            | 965.526                         |
| 0                            | 966.031                         |
| 0                            | 964.608                         |
| 0                            | 964.271                         |
| 0                            | 965.954                         |
| 0                            | 966.536                         |
| 0                            | 964.284                         |
| 0                            | 964.9                           |
| 0                            | 965.541                         |
| Average                      | 965.172                         |
| STDEV                        | 0.86132                         |

$S = -\text{Slope} = 1.9426 \mu\text{M}^{-1}$

$\text{STDEV} = \sigma = \sqrt{\frac{\sum(F-F)^2}{(N-1)}} = 0.86132 (N = 10)$

$\text{LOD} = 3 * \sigma / S = 1.33 \mu\text{M} = 1.3 * 10^{-6} \text{M}$

Fig. S8. The fluorescence spectrum linear range of HAQ (50  $\mu$ M) at 386 nm upon addition of Fe<sup>3+</sup>.

Determination of binding constant for Fe<sup>3+</sup> complex using Benesi–Hildebrand equation.

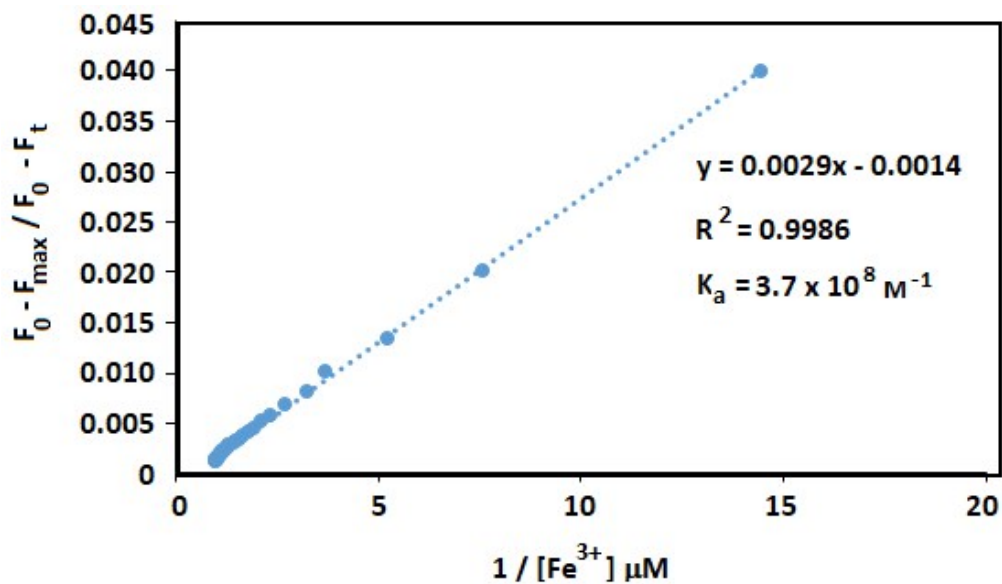

Fig. S9. The Association constant ( $K_a$ ) of AQ-Fe<sup>3+</sup> complex.

$$\frac{1}{F_0 - F_t} = \frac{1}{(K_a \times (F_0 - F_{\max}) \times [\text{Fe}^{3+}]) + 1} + \frac{1}{(F_0 - F_{\max})}$$

$K_a = 3.7 \times 10^8 \text{ M}^{-1}$

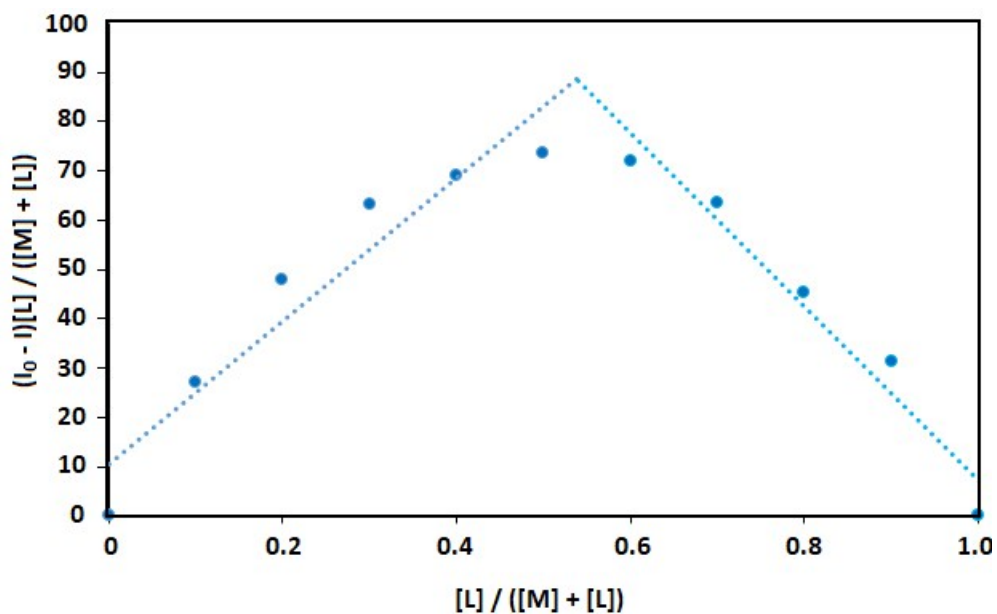

Fig. S10. Job's plot of the AQ-Fe<sup>3+</sup> complex in DMSO, with the monitoring wavelength set at 486 nm.



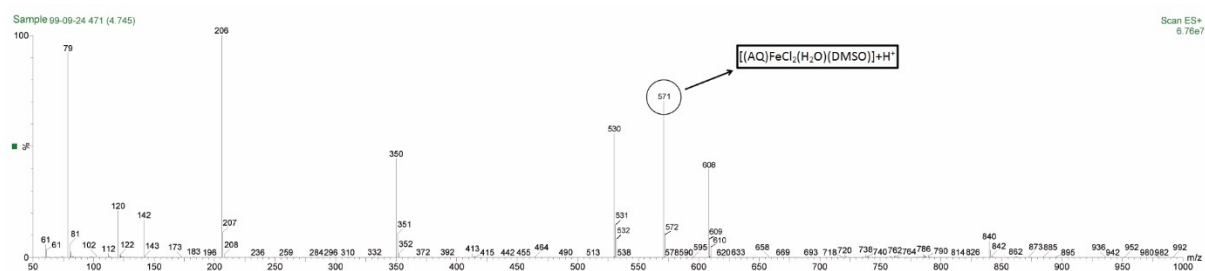

**Fig. S11.** ESI-MS spectrum for  $\text{AQ-Fe}^{3+}$  in DMSO with the peak at  $m/z = 571.00$  corresponding to  $\{[(\text{AQ})\text{FeCl}_2(\text{H}_2\text{O})(\text{DMSO})] + \text{H}^+\}$  (calculated  $m/z = 571.30$ ).

## X-ray crystallography of HAQ

Colorless crystals of **HAQ** suitable for X-ray crystallography were obtained by slow evaporation of solution of the ligand in CH<sub>2</sub>Cl<sub>2</sub>-CH<sub>3</sub>OH (4:3 v/v) at room temperature. X-ray data of the **HAQ** were collected on a Stoe IPDS-2T diffractometer with graphite monochromated Mo K $\alpha$  ( $\lambda = 0.71073$  Å) radiation. Data were collected at 296(2) K in a series of  $\omega$  scans in 1° oscillations and integrated using the Stoe X-AREA 1.43 software package.<sup>1</sup> The structure was solved by direct methods using SHELXTL-2008.<sup>2</sup> The non-hydrogen atoms were refined anisotropically by the full-matrix least-squares method on  $F^2$  using the SHELXTL program.<sup>2</sup> The hydrogen atoms were treated by a mixture of independent and constrained refinements. Details of crystallographic data and refinements of the HAQ chemosensor are summarized in Table S1. CCDC 2003356 contains the supplementary crystallographic data for this paper. These data can be obtained free of charge from The Cambridge Crystallographic Data Centre via [www.ccdc.cam.ac.uk/data\\_request/cif](http://www.ccdc.cam.ac.uk/data_request/cif).

1 X-AREA, version 1.30, program for the acquisition and analysis of data, Stoe & Cie GmbH, Darmstadt, Germany, 2005.

2 G.M. Sheldrick, Acta Crystallogr. Sect. A 64 (2008) 112-122. DOI: 10.1107/S0108767307043930.

**Table S1.** Crystal data and structure refinement for chemosensor **HAQ**.

|                                                                            |                                                             |
|----------------------------------------------------------------------------|-------------------------------------------------------------|
| Chemical formula                                                           | C <sub>24</sub> H <sub>16</sub> N <sub>2</sub> O            |
| M <sub>r</sub>                                                             | 347.62                                                      |
| T (K)                                                                      | 296(2)                                                      |
| $\lambda$ (Å)                                                              | 0.71073                                                     |
| Crystal system, space group                                                | Triclinic, $P\bar{1}$                                       |
| $a$ (Å)                                                                    | 8.8312(18)                                                  |
| $b$ (Å)                                                                    | 16.467(3)                                                   |
| $c$ (Å)                                                                    | 24.385(5)                                                   |
| $\alpha$ (°)                                                               | 89.63(3)                                                    |
| $\beta$ (°)                                                                | 87.94(3)                                                    |
| $\gamma$ (°)                                                               | 89.72(3)                                                    |
| $V$ (Å <sup>3</sup> )                                                      | 3543.8(12)                                                  |
| $Z$ , $D_{\text{calc}}$ (Mg/m <sup>3</sup> )                               | 2, 1.303                                                    |
| Crystal size (mm)                                                          | 0.21 × 0.11 × 0.07                                          |
| $\mu$ (mm <sup>-1</sup> )                                                  | 0.081                                                       |
| F(000)                                                                     | 1450                                                        |
| $\theta$ ranges (°)                                                        | 2.61-29.64                                                  |
| Absorption correction                                                      | Multi-scan                                                  |
| Reflections collected/unique/ $R_{\text{int}}$                             | 15362/ 11915/ 0.095                                         |
| Data/restraints/parameters                                                 | 11915/0/877                                                 |
| Refinement method                                                          | Full-matrix least-squares on $F^2$                          |
| $R[F^2 > 2\sigma(F^2)]$ , $wR(F^2)$ , $S$                                  | 0.057, 0.109, 0.50                                          |
| Goodness-of-fit on $F^2$                                                   | 0.504                                                       |
| Final $R$ indices [ $I > 2\sigma(I)$ ]                                     | $R1 = 0.4154$ , $wR2 = 0.1089$                              |
| $R$ indices (all data)                                                     | $R1 = 0.0565$ , $wR2 = 0.0691$                              |
| H-atom treatment                                                           | H-atoms treated by a mixture of independent and constrained |
| $\Delta\rho_{\text{max}}$ , $\Delta\rho_{\text{min}}$ (e Å <sup>-3</sup> ) | 0.136, -0.125                                               |

**Table S2.** Selected bond lengths (Å) and angles (°) for chemosensor **HAQ**.

| Bond lengths |           | Bond angles      |           |
|--------------|-----------|------------------|-----------|
| C(11)-O(1)   | 1.207(14) | O(1)-C(11)-N(1)  | 126.5(9)  |
| N(1)-C9(11)  | 1.426(16) | O(1)-C(11)-C(12) | 128.0(13) |
| N(1)-C(1)    | 1.382(9)  | N(1)-C(11)-C(12) | 105.5(10) |
| C(11)-C(12)  | 1.578(10) |                  |           |

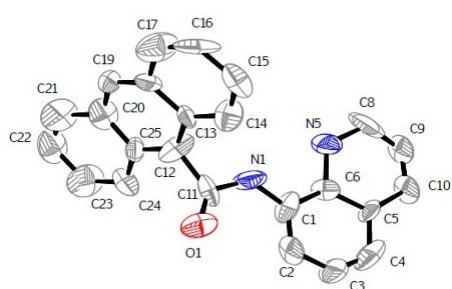

HAQ

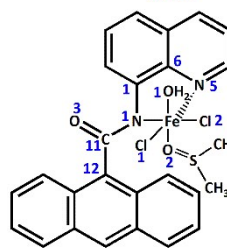

Yellow Complex

$[(\text{AQ})\text{FeCl}_2(\text{H}_2\text{O})(\text{DMSO})]$

**Table S3.** Bond lengths (Å) and bond angles (°) of HAQ and  $[(\text{AQ})\text{FeCl}_2(\text{H}_2\text{O})(\text{DMSO})]$  complex.

| Compound      | Bond lengths |             | Bond angles            |                  |                  |             |
|---------------|--------------|-------------|------------------------|------------------|------------------|-------------|
|               | Experimental | Theoretical | Experimental           | Theoretical      |                  |             |
| HAQ           | C(11)-O(1)   | 1.207(14)   | 1.228                  | O(1)-C(11)-N(1)  | 126.5(9)         | 124.3       |
|               | C(11)-N(1)   | 1.426(16)   | 1.364                  | O(1)-C(11)-C(12) | 128.0(13)        | 121.7       |
|               | C(1)-N(1)    | 1.382(9)    | 1.402                  | N(1)-C(11)-C(12) | 105.5(10)        | 114.1       |
|               | C(6)-N(5)    | 1.488(11)   | 1.361                  | C(6)-C(1)-N(1)   | 116.2(11)        | 115.0       |
|               |              |             |                        | C(1)-C(6)-N(5)   | 121.4(9)         | 118.0       |
|               | Bond lengths |             | Theoretical            | Bond angles      |                  | Theoretical |
| AQ-Fe Complex |              |             | N(1)-Fe                | 2.101            | N(1)-C(1)-C(6)   | 117.2       |
|               |              |             | N(5)-Fe                | 2.206            | N(5)-C(6)-C(1)   | 117.4       |
|               |              |             | H <sub>2</sub> O(1)-Fe | 2.230            | C(1)-N(1)-C(11)  | 116.9       |
|               |              |             | Cl(1)-Fe               | 2.331            | N(1)-C(11)-C(12) | 118.7       |
|               |              |             | Cl(2)-Fe               | 2.455            | N(1)-Fe-O(1)     | 86.0        |
|               |              |             | O(2)-Fe                | 2.022            | N(1)-Fe-O(2)     | 95.9        |
|               |              |             | N(1)-C(1)              | 1.405            | N(5)-Fe-O(1)     | 86.5        |
|               |              |             | N(1)-C(11)             | 1.388            | N(5)-Fe-O(2)     | 88.0        |
|               |              |             | C(11)-O(3)             | 1.232            | Cl(1)-Fe-O(1)    | 90.6        |
|               |              |             | C(11)-C(12)            | 1.508            | Cl(1)-Fe-O(2)    | 94.6        |
|               |              |             |                        |                  | Cl(2)-Fe-O(1)    | 82.5        |
|               |              |             |                        |                  | Cl(2)-Fe-O(2)    | 94.1        |
|               |              |             |                        |                  | N(5)-Fe-Cl(1)    | 175.9       |
|               |              |             |                        |                  | N(5)-Fe-Cl(2)    | 87.0        |
|               |              |             |                        | N(1)-Fe-Cl(1)    | 105.2            |             |
|               |              |             |                        | N(1)-Fe-Cl(2)    | 161.2            |             |
|               |              |             |                        | Cl(1)-Fe-Cl(2)   | 89.7             |             |
|               |              |             |                        | O(1)-Fe-O(2)     | 173.7            |             |
|               |              |             |                        | N(1)-Fe-N(5)     | 77.5             |             |
|               |              |             |                        | C(6)-N(5)-Fe     | 112.6            |             |
|               |              |             |                        | C(1)-N(1)-Fe     | 114.6            |             |

| MO     | Complex                                                                              | E (eV) | SPIN |
|--------|--------------------------------------------------------------------------------------|--------|------|
|        | 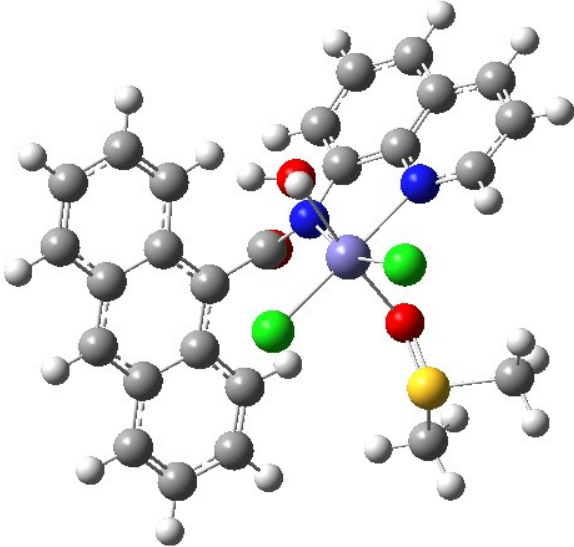   | --     | --   |
| LUMO+7 |  | -2.12  | --   |

|               |                                                                                      |              |    |
|---------------|--------------------------------------------------------------------------------------|--------------|----|
| <b>LUMO+6</b> | 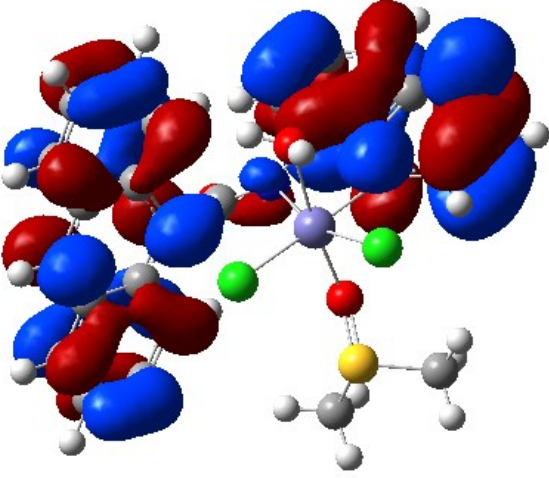   | <b>-2.21</b> | -- |
| <b>LUMO+5</b> |   | <b>-2.33</b> | -- |
| <b>LUMO+4</b> |  | <b>-2.61</b> | -- |

|               |                                                                                      |              |    |
|---------------|--------------------------------------------------------------------------------------|--------------|----|
| <b>LUMO+3</b> | 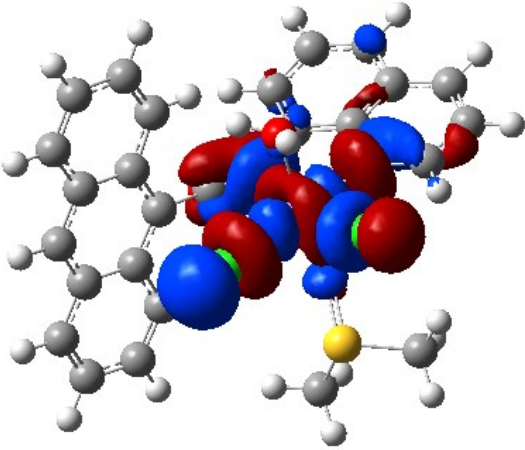   | <b>-2.67</b> | -- |
| <b>LUMO+2</b> |   | <b>-3.60</b> | -- |
| <b>LUMO+1</b> |  | <b>-3.65</b> | -- |

|               |                                                                                      |              |                            |
|---------------|--------------------------------------------------------------------------------------|--------------|----------------------------|
| <b>LUMO</b>   | 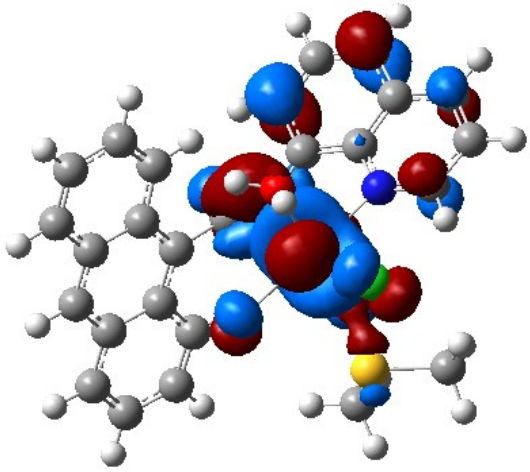   | <b>-3.93</b> | <b>--</b>                  |
| <b>HOMO</b>   |   | <b>-5.71</b> | <b><math>\beta</math></b>  |
| <b>HOMO-1</b> |  | <b>-5.72</b> | <b><math>\alpha</math></b> |

|                      |                                                                                      |                     |                            |
|----------------------|--------------------------------------------------------------------------------------|---------------------|----------------------------|
| <p><b>HOMO-2</b></p> | 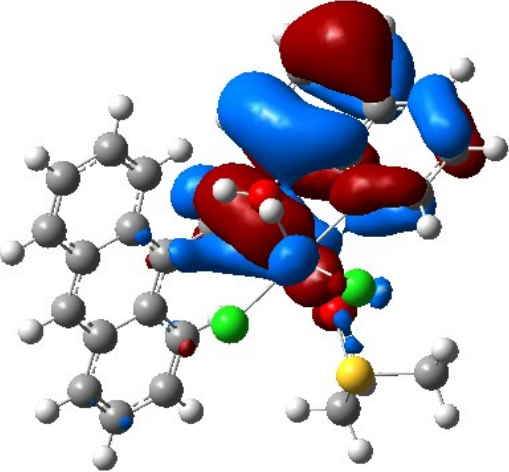   | <p><b>-6.03</b></p> | <p><math>\beta</math></p>  |
| <p><b>HOMO-3</b></p> |   | <p><b>-6.07</b></p> | <p><math>\alpha</math></p> |
| <p><b>HOMO-4</b></p> |  | <p><b>-6.93</b></p> | <p><math>\alpha</math></p> |



|                      |                                                                                      |                     |                                   |
|----------------------|--------------------------------------------------------------------------------------|---------------------|-----------------------------------|
| <p><b>HOMO-5</b></p> | 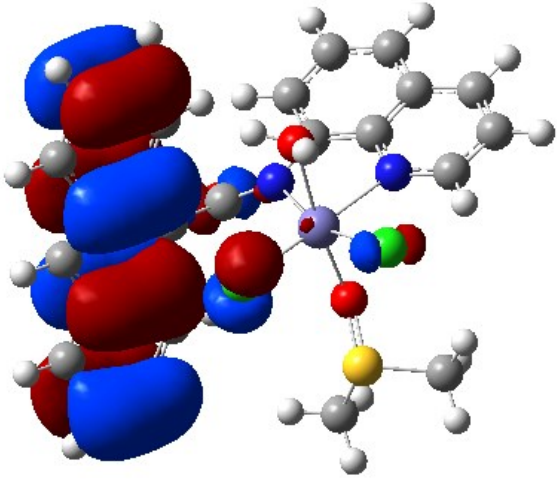   | <p><b>-6.95</b></p> | <p><b><math>\beta</math></b></p>  |
| <p><b>HOMO-6</b></p> |   | <p><b>-7.05</b></p> | <p><b><math>\alpha</math></b></p> |
| <p><b>HOMO-7</b></p> |  | <p><b>-7.17</b></p> | <p><b><math>\beta</math></b></p>  |

|                |                                                                                      |              |                            |
|----------------|--------------------------------------------------------------------------------------|--------------|----------------------------|
| <b>HOMO-8</b>  | 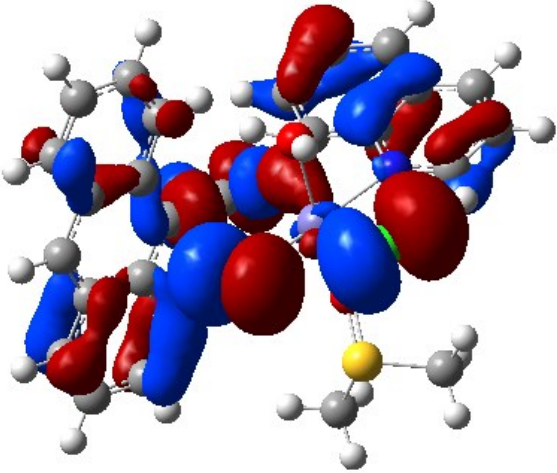   | <b>-7.25</b> | <b><math>\beta</math></b>  |
| <b>HOMO-9</b>  |   | <b>-7.30</b> | <b><math>\alpha</math></b> |
| <b>HOMO-10</b> |  | <b>-7.41</b> | <b><math>\beta</math></b>  |

|                       |                                                                                      |                     |                                   |
|-----------------------|--------------------------------------------------------------------------------------|---------------------|-----------------------------------|
| <p><b>HOMO-11</b></p> | 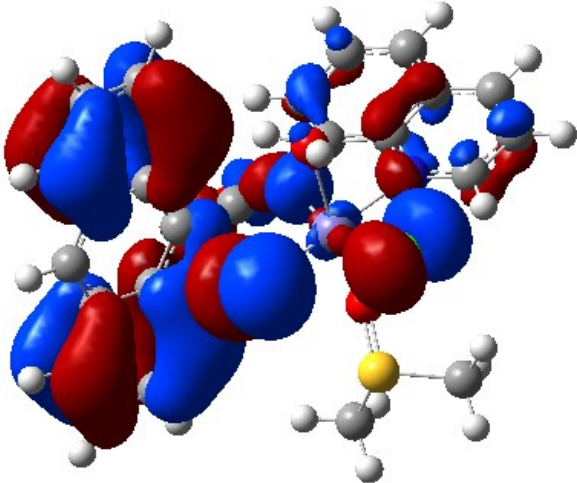   | <p><b>-7.41</b></p> | <p><b><math>\alpha</math></b></p> |
| <p><b>HOMO-12</b></p> |   | <p><b>-7.43</b></p> | <p><b><math>\alpha</math></b></p> |
| <p><b>HOMO-13</b></p> |  | <p><b>-7.51</b></p> | <p><b><math>\beta</math></b></p>  |

|                       |                                                                                      |                     |                                   |
|-----------------------|--------------------------------------------------------------------------------------|---------------------|-----------------------------------|
| <p><b>HOMO-14</b></p> | 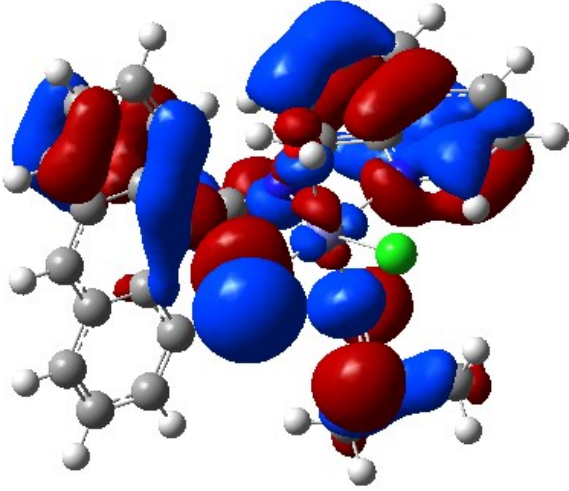   | <p><b>-7.57</b></p> | <p><b><math>\alpha</math></b></p> |
| <p><b>HOMO-15</b></p> |   | <p><b>-7.66</b></p> | <p><b><math>\beta</math></b></p>  |
| <p><b>HOMO-16</b></p> |  | <p><b>-7.66</b></p> | <p><b><math>\alpha</math></b></p> |

|                       |                                                                                      |                     |                                   |
|-----------------------|--------------------------------------------------------------------------------------|---------------------|-----------------------------------|
| <p><b>HOMO-17</b></p> | 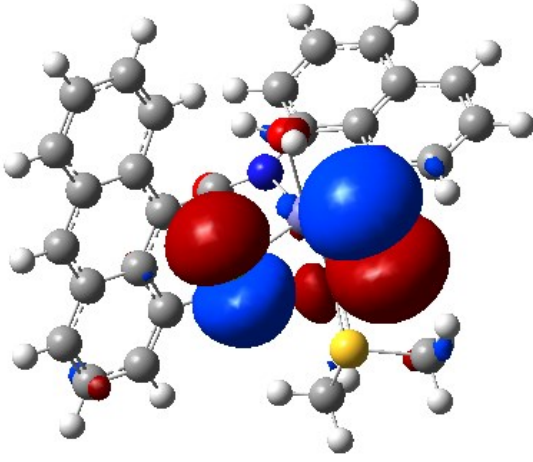   | <p><b>-7.78</b></p> | <p><b><math>\alpha</math></b></p> |
| <p><b>HOMO-18</b></p> |   | <p><b>-7.84</b></p> | <p><b><math>\beta</math></b></p>  |
| <p><b>HOMO-19</b></p> |  | <p><b>-7.86</b></p> | <p><b><math>\beta</math></b></p>  |

|                |                                                                                    |              |          |
|----------------|------------------------------------------------------------------------------------|--------------|----------|
| <b>HOMO-20</b> | 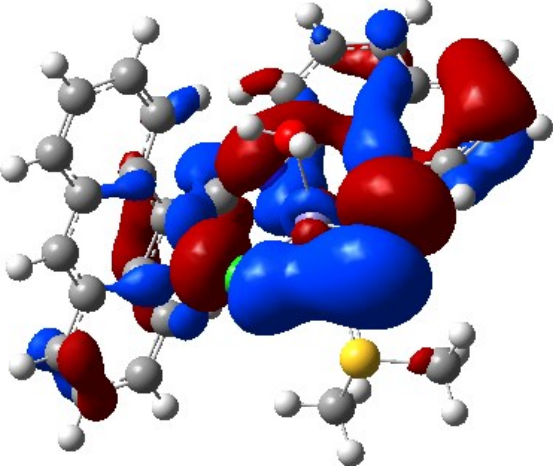 | <b>-7.89</b> | $\alpha$ |
|----------------|------------------------------------------------------------------------------------|--------------|----------|

| <b>MO</b> | <b>HAQ</b>                                                                           | <b>E (eV)</b> |
|-----------|--------------------------------------------------------------------------------------|---------------|
|           | 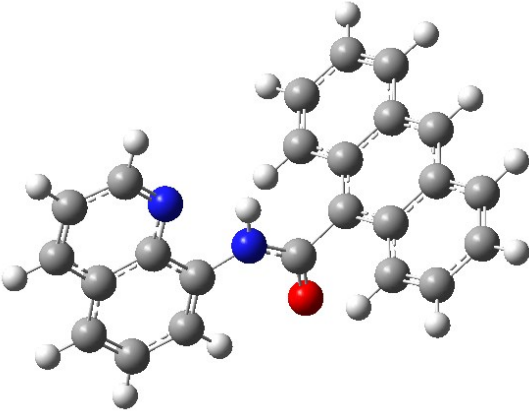 |               |

|                      |                                                                                      |                     |
|----------------------|--------------------------------------------------------------------------------------|---------------------|
| <p><b>LUMO+1</b></p> | 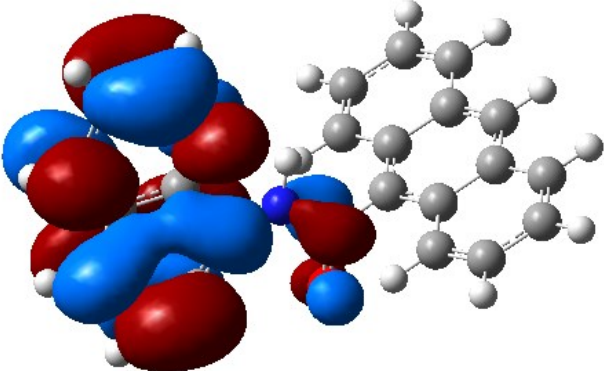   | <p><b>-2.04</b></p> |
| <p><b>LUMO</b></p>   |   | <p><b>-2.30</b></p> |
| <p><b>HOMO</b></p>   |  | <p><b>-5.81</b></p> |

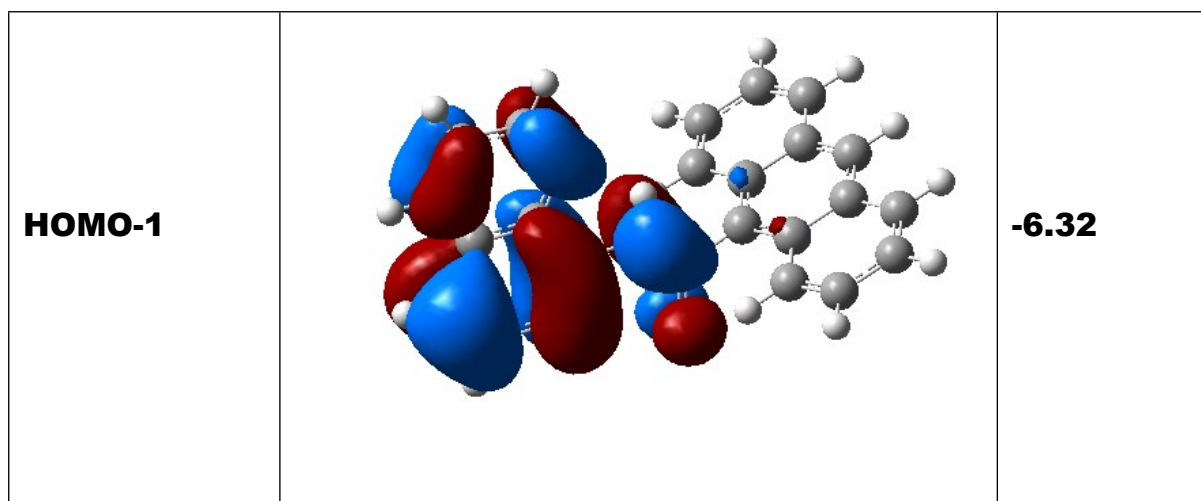

**Fig. S12** Structures and Profiles of frontier molecular orbitals of the **HAQ** and  $[(\mathbf{AQ})\text{FeCl}_2(\text{H}_2\text{O})(\text{DMSO})]$ .
